# Supplementary material for: Ultrathin metal–organic framework membrane production by gel–vapour deposition
Source: PubMed Central journal article supplement (PMC5581339; doi:10.1038/s41467-017-00544-1), 2017-09-01
Supplement: 41467_2017_544_MOESM1_ESM.pdf [file 41467_2017_544_MOESM1_ESM.pdf]

### **Description of Supplementary Files**

File Name: Supplementary Information

Description: Supplementary Figures, Supplementary Tables and Supplementary References

File Name: Peer Review File

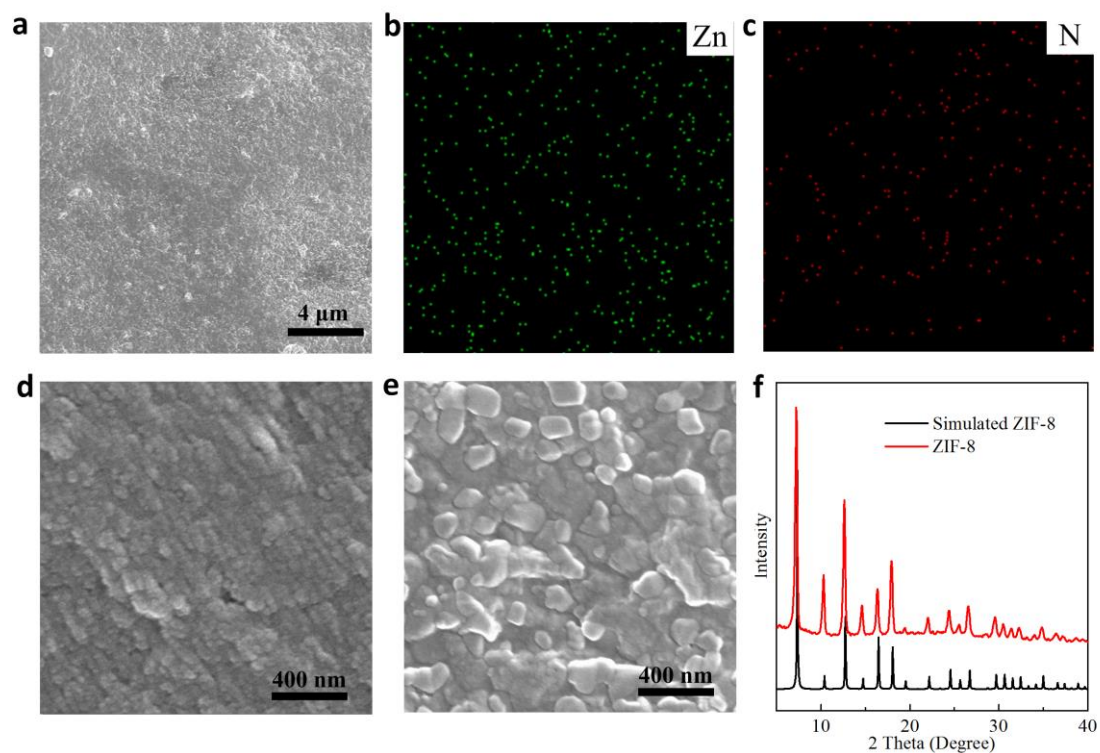

**Supplementary Figure 1 | SEM images and XRD patterns of ZIF-8 membranes.**

**a**, Top view SEM image of ZIF-8 membrane. The sample was prepared with sol concentration of 1 U, coating time of 2 s and deposition time of 2 h. **b,c**, Energy dispersion spectroscopy (EDS) mapping of the ZIF-8 membrane corresponding to image **a**. Top view SEM image of **d**, the inner surface and **e**, the ZIF-8 layer on inner surface of the PVDF hollow fibre. **f**, XRD patterns of the simulated ZIF-8 and the ZIF-8 membrane on inner surface of the PVDF hollow fibre.

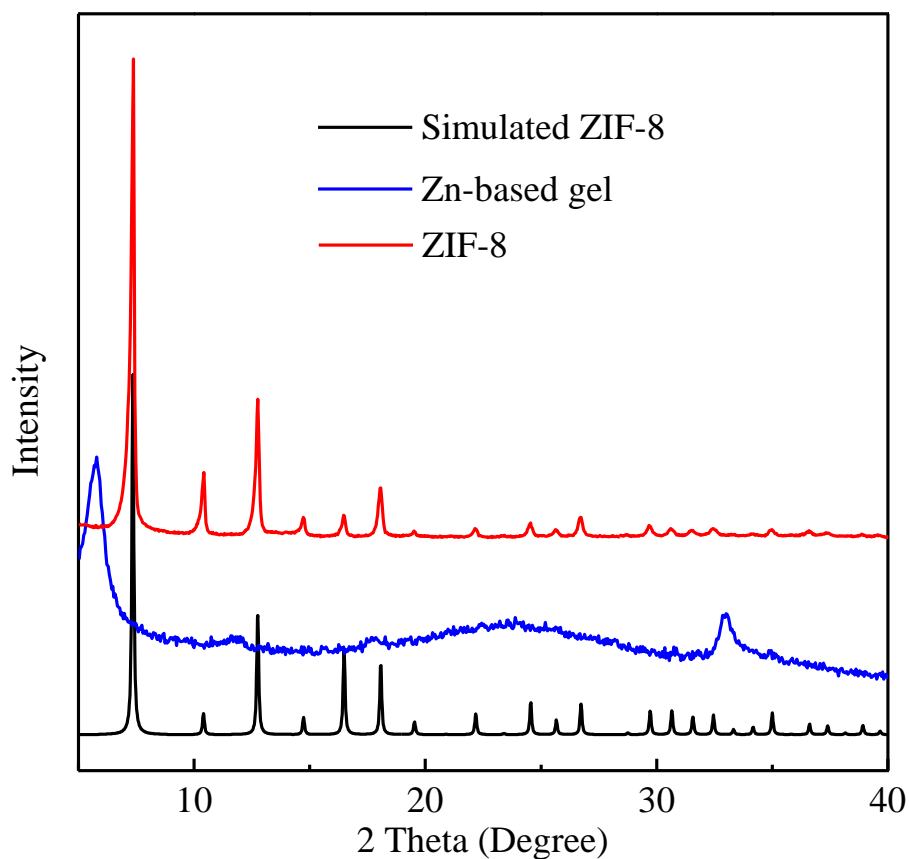

**Supplementary Figure 2 | Powder XRD patterns of Zn-based gel and experimental ZIF-8 powder.** The Zn-based gel and bulk ZIF-8 powder were synthesized without substrate. The simulated XRD pattern of ZIF-8 is shown for reference. This result indicates that gel has been transformed to ZIF-8, and the prepared ZIF-8 shows intact crystalline structure.

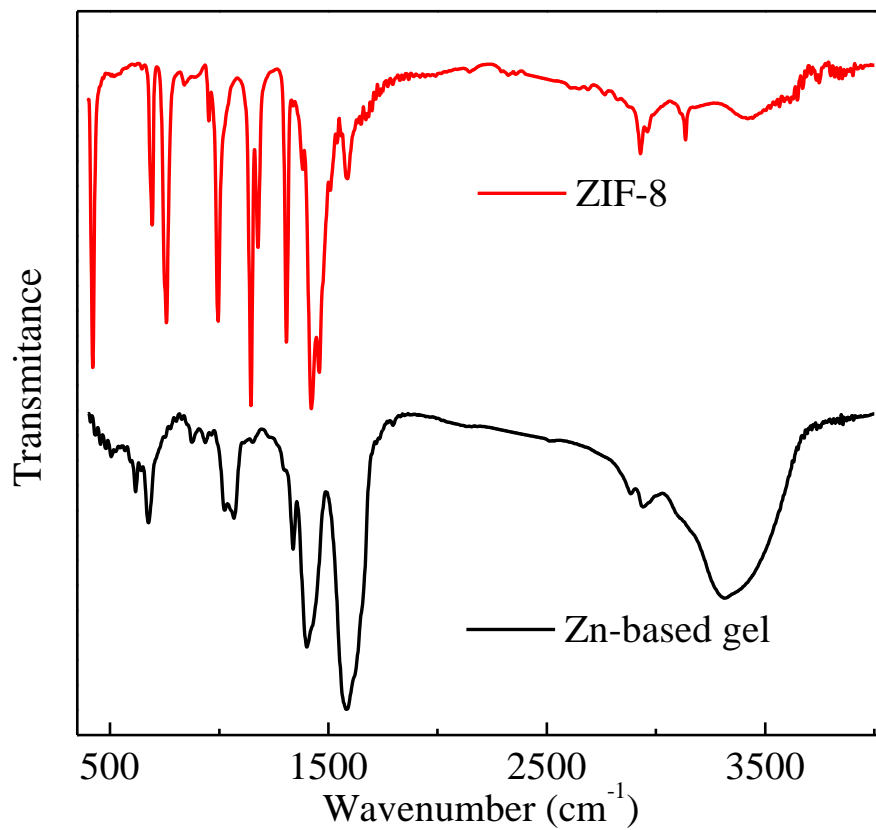

**Supplementary Figure 3 | FTIR spectrums of Zn-based gel and prepared ZIF-8.**

The Zn-based gel and bulk ZIF-8 powder were synthesized without substrate. This result shows the change of chemical structure after vapour deposition, demonstrates the formation of ZIF-8.

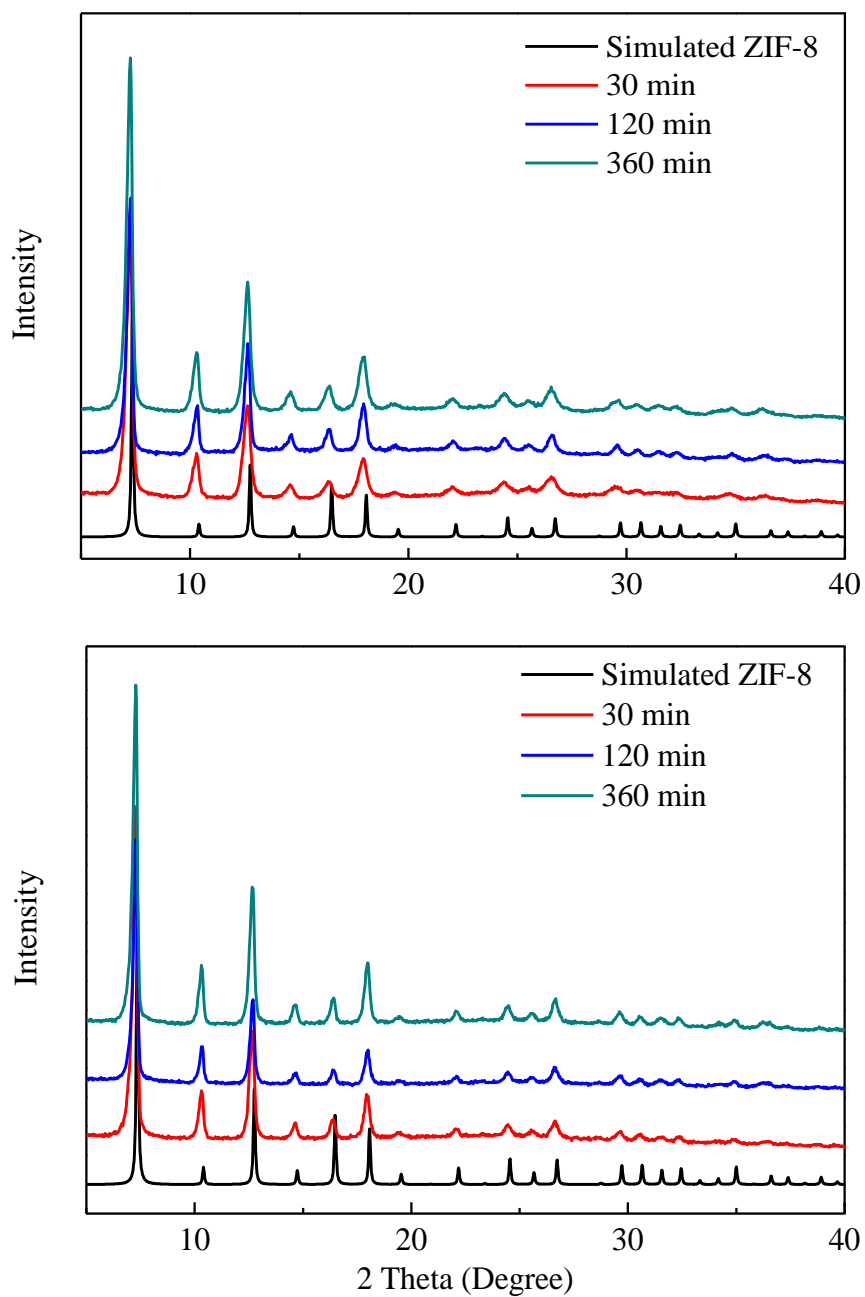

**Supplementary Figure 4 | XRD patterns of ZIF-8 membranes with different deposition time (top) and calcinated ZIF-8 membranes with different deposition time (bottom).** The simulated XRD pattern of ZIF-8 is shown for reference. There are no characteristic peaks of ZnO in calcinated ZIF-8 membranes, which verifies that all Zn-based gel has been transformed to ZIF-8.

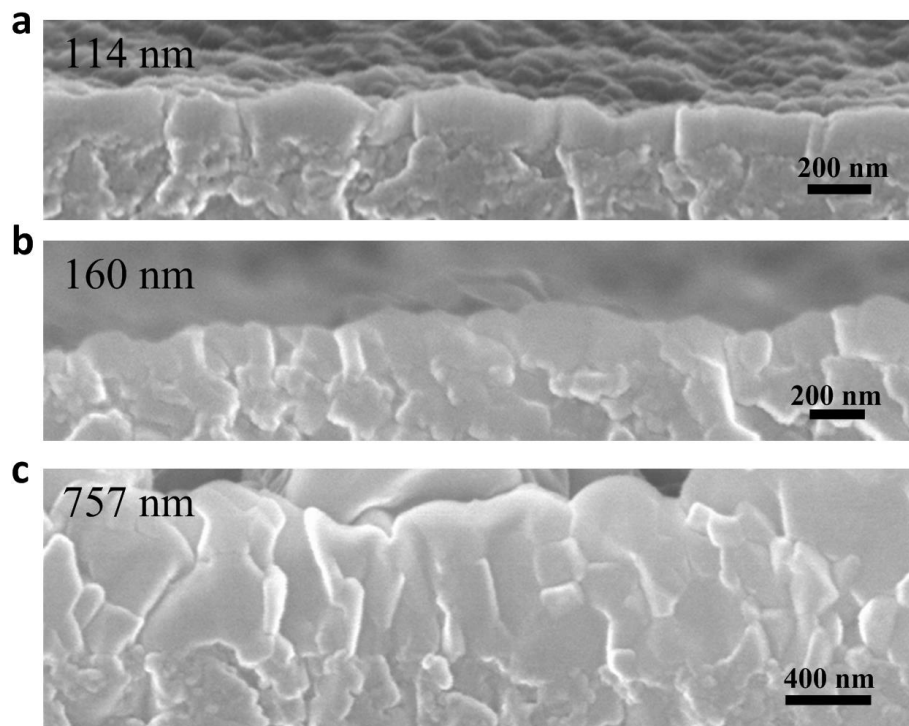

**Supplementary Figure 5 | Cross-sectional view SEM images of ZIF-8 membranes with various coating times. a, 5 s, b, 10 s and c, 30 s.** These ZIF-8 membranes were prepared with sol concentration of 1 U and deposition time of 2 h. The thickness of the membrane increases with the coating time.

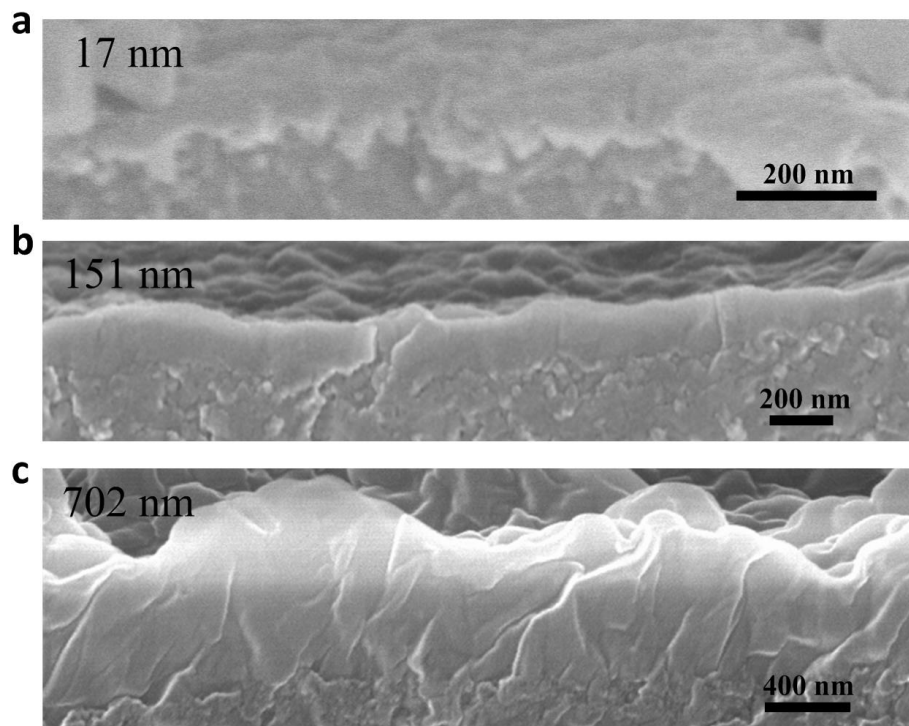

**Supplementary Figure 6 | Cross-sectional view SEM images of ZIF-8 membranes with various sol concentrations. a, 0.1 U, b, 1.5 U and c, 2 U.** These ZIF-8 membranes were prepared with coating time of 2 s and deposition time of 2 h. The thickness of membrane increases with the sol concentration.

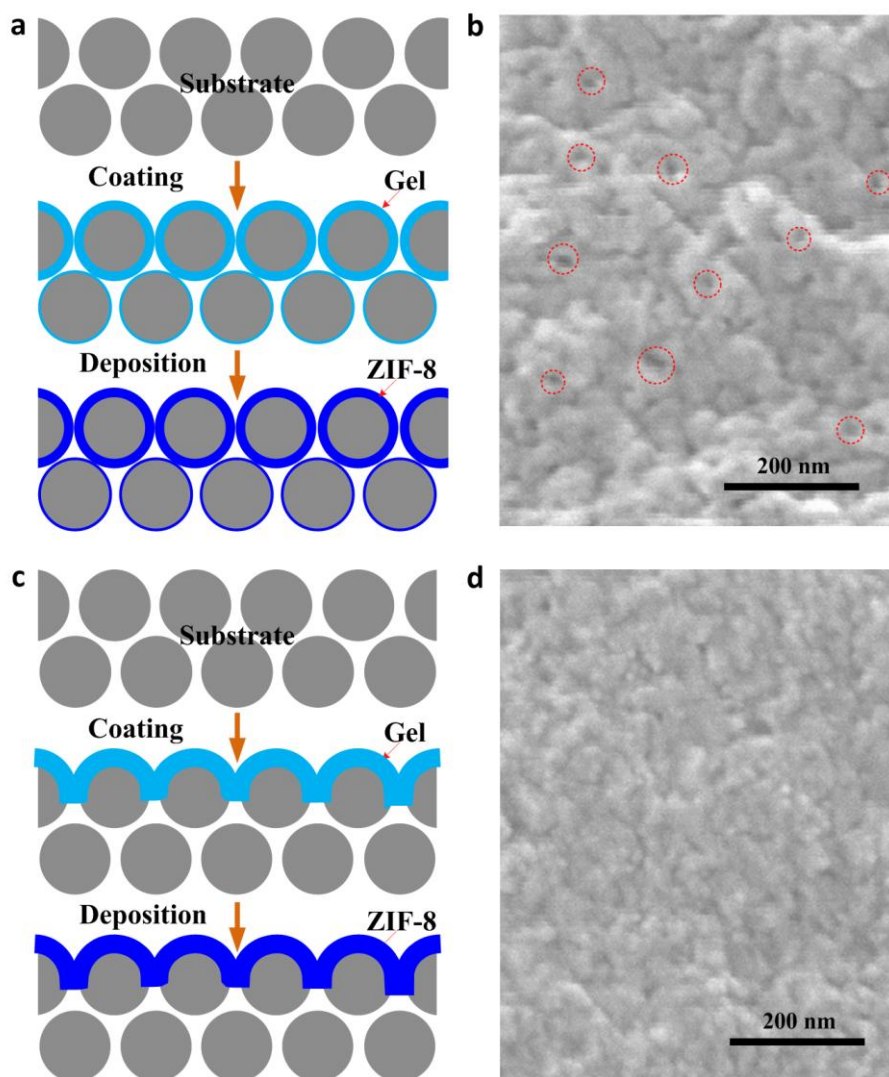

**Supplementary Figure 7 | Schematic diagrams and top view SEM images.** **a,c**, Schematic diagram and **b,d**, top view SEM image of **a,b**, the noncontinuous ZIF-8 membrane fabricated with sol concentration of 0.05 U and **c,d**, the continuous ZIF-8 membrane fabricated with sol concentration of 0.1 U. These ZIF-8 membranes were prepared with coating time of 2 s and deposition time of 2 h. The small concentration means the low viscosity, which leads to the small loading and spread in internal substrate of Zn-based sol. Because the surface of porous substrate is composed of nanoparticles with diameter of 20-50 nm, the formed membrane has some cracks.



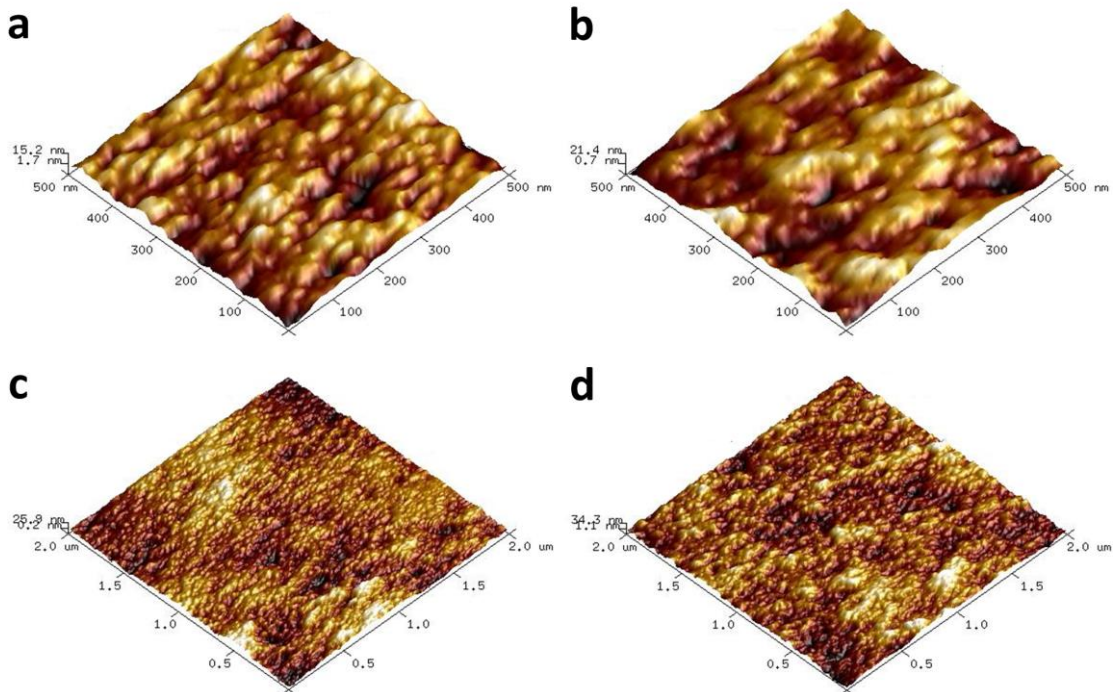

**Supplementary Figure 8 | AFM images of Zn-based gel layer and ZIF-8 membrane.** AFM analysis of **a,c**, Zn-based gel layer and **b,d**, ZIF-8 layer on PVDF hollow fibres. The samples were prepared with sol concentration of 0.1 U and coating time of 2 s. The vapour deposition time was 2 h. Root mean square roughness ( $R_q$ ): **a**, 3.6 nm, **b**, 5.8 nm **c**, 7.0 nm, **d**, 9.3 nm. Arithmetic average roughness ( $R_a$ ): **a**, 2.8 nm, **b**, 4.7 nm **c**, 5.5 nm, **d**, 7.3 nm.

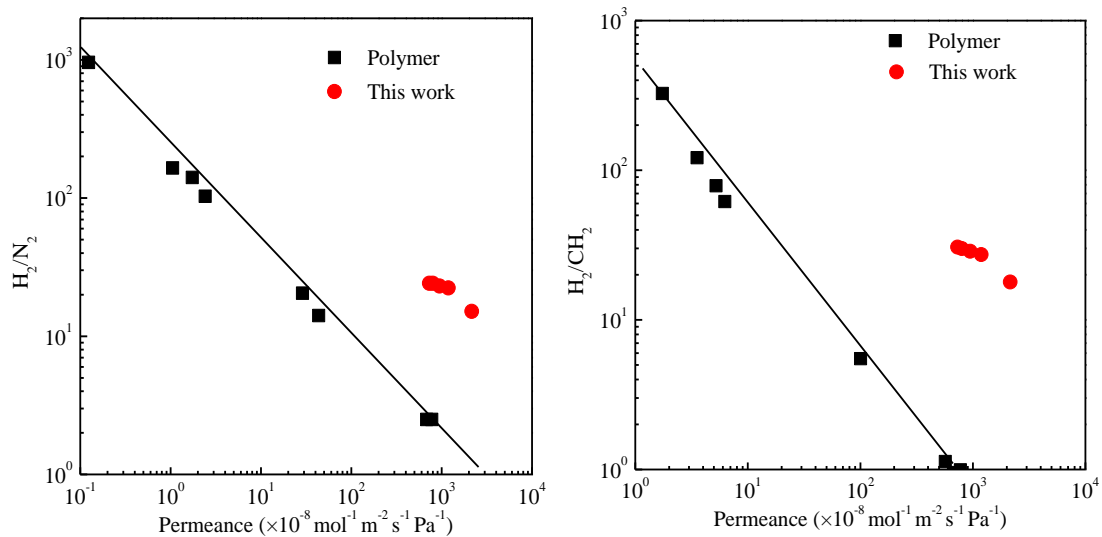

**Supplementary Figure 9 | Comparison of the prepared ZIF-8 membranes with polymer membranes reported in previous studies for  $H_2/N_2$  and  $H_2/CH_4$  systems.**

The black line is the Robeson's upper-bound of polymeric membranes reported in 2008. The permeance is calculated from permeability by assuming membrane thickness of  $1 \mu\text{m}$ . In  $H_2/N_2$  and  $H_2/CH_4$  systems, the performance of our membranes can surpass the Robeson's upper-bound.

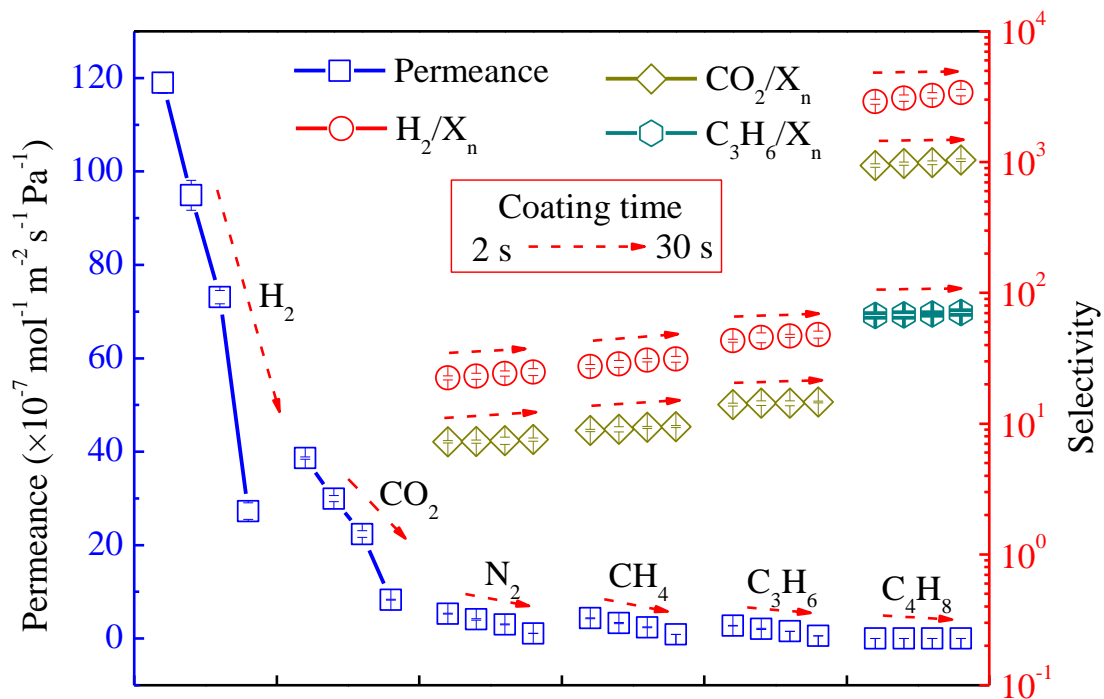

**Supplementary Figure 10 | Single gas permeation behaviour of various gases through ZIF-8 membranes with various coating times of 2 s, 5 s, 10 s and 30 s.**

These ZIF-8 membranes were prepared with sol concentration of 1 U and deposition time of 2 h. Blue square is gas permeance.  $H_2/X_n$ ,  $CO_2/X_n$  and  $C_3H_6/X_n$  selectivities are depicted in red circle, dark yellow rhombus and dark cyan hexagon, respectively.  $X_n$  represents various gases. Red arrow shows the increasing direction of coating time. Gas permeances decreased with increases of coating time.

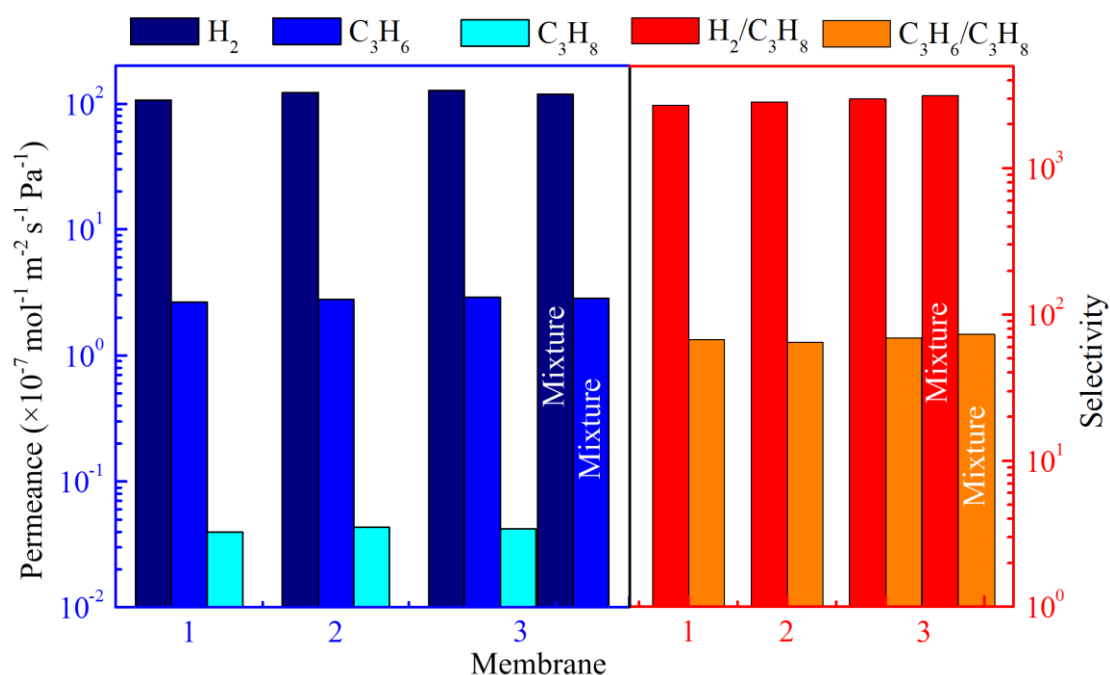

**Supplementary Figure 11 | Gas permeation behaviours of additional three ZIF-8**

**membranes.** These ZIF-8 membranes were prepared with sol concentration of 1 U, coating time of 2 s and deposition time of 2 h. The H<sub>2</sub> permeances of these three membranes were 106.5, 122.9 and 126.7 ×10<sup>-7</sup> mol m<sup>-2</sup> s<sup>-1</sup> Pa<sup>-1</sup>, and the corresponding selectivities of H<sub>2</sub>/C<sub>3</sub>H<sub>8</sub>-C<sub>3</sub>H<sub>6</sub>/C<sub>3</sub>H<sub>8</sub> were 2701-67.2, 2845-64.4 and 3012-68.9, respectively. The results demonstrate the good reproducibility of the membranes. In binary mixture separation of additional ZIF-8 membrane 3, the similar permeances (117.8 ×10<sup>-7</sup> mol m<sup>-2</sup> s<sup>-1</sup> Pa<sup>-1</sup> for H<sub>2</sub> in H<sub>2</sub>/C<sub>3</sub>H<sub>8</sub> separation and 2.8 ×10<sup>-7</sup> mol m<sup>-2</sup> s<sup>-1</sup> Pa<sup>-1</sup> for C<sub>3</sub>H<sub>6</sub> in C<sub>3</sub>H<sub>6</sub>/C<sub>3</sub>H<sub>8</sub> separation) and selectivities (3126 for H<sub>2</sub>/C<sub>3</sub>H<sub>8</sub> and 73.4 for C<sub>3</sub>H<sub>6</sub>/C<sub>3</sub>H<sub>8</sub>) were achieved.

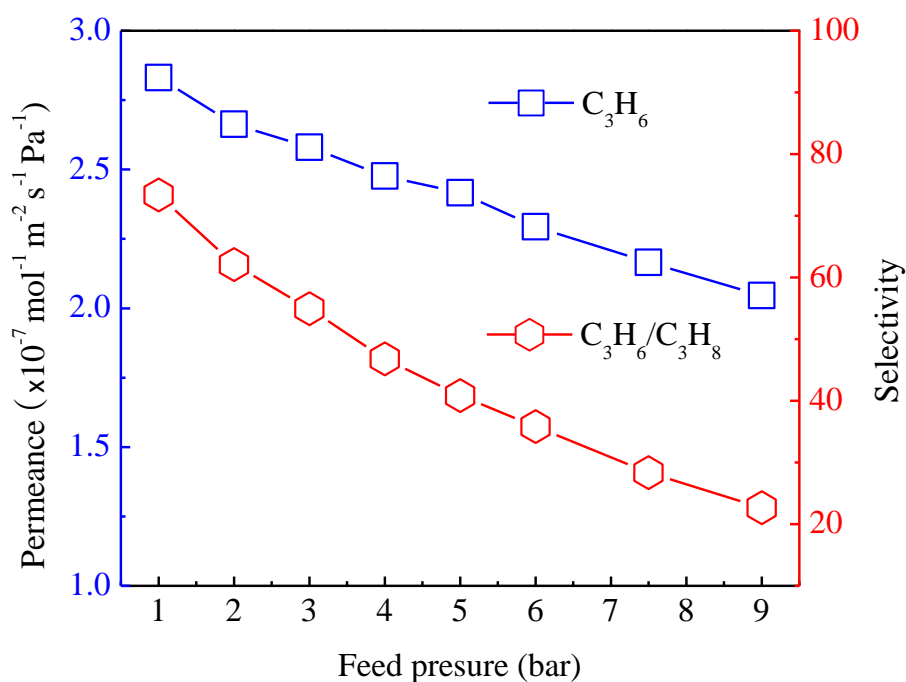

**Supplementary Figure 12 | Effect of feed pressure on separation performance of  $C_3H_6/C_3H_8$  mixture.** The membrane was the additional ZIF-8 membrane 3, as shown in Supplementary Figure 11. The selectivity and the  $C_3H_6$  permeance both decreased with the increase of feed pressure due to the gate opening of window of ZIF-8 structure and the competitively diffusion of the  $C_3H_6$  and  $C_3H_8$  through the membrane. However, membrane still showed good  $C_3H_6/C_3H_8$  selectivity of 22.7 and  $C_3H_6$  permeance of  $2.0 \times 10^{-7} \text{ mol m}^{-2} \text{ s}^{-1} \text{ Pa}^{-1}$  at 9 bar.

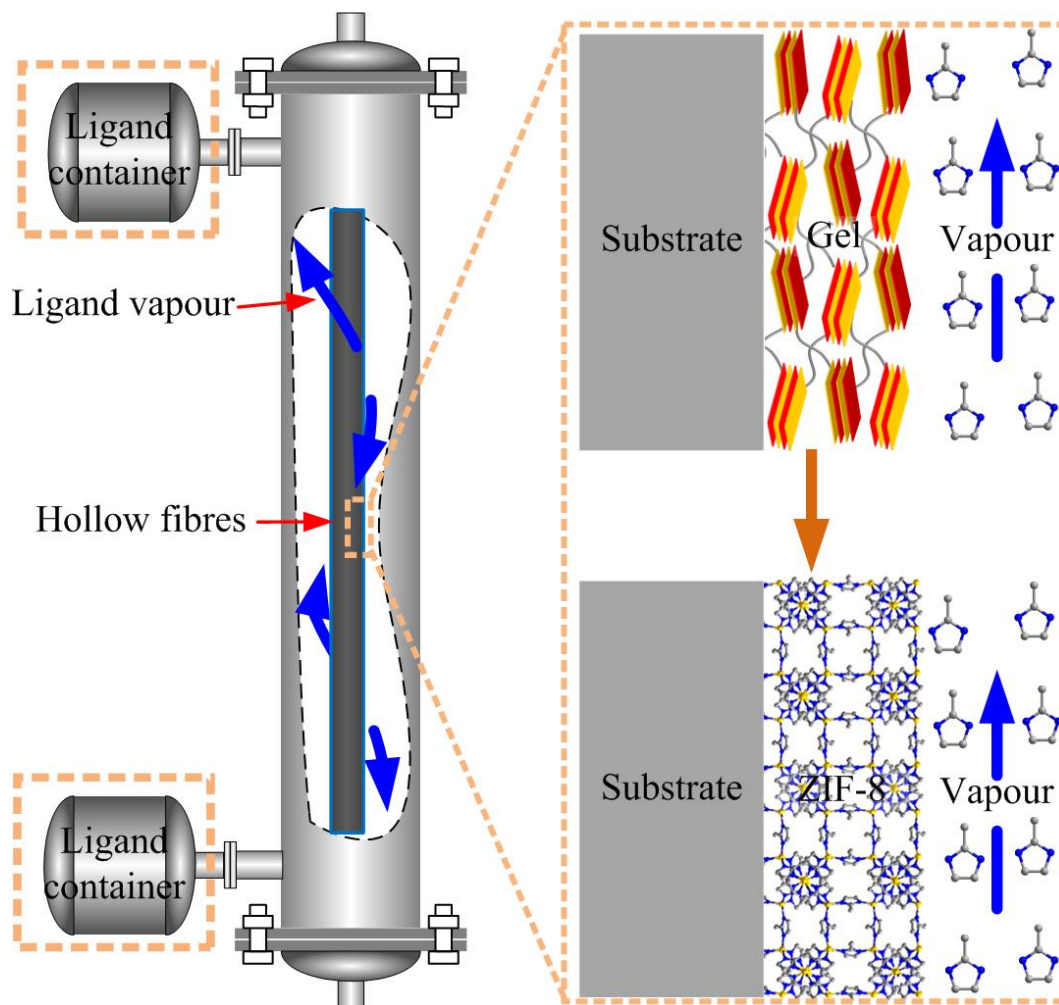

**Supplementary Figure 13 | Schematic diagram of in situ production of MOF membrane module (left) and crystallization process (right). Blue arrows present the diffusion of ligand vapour.**

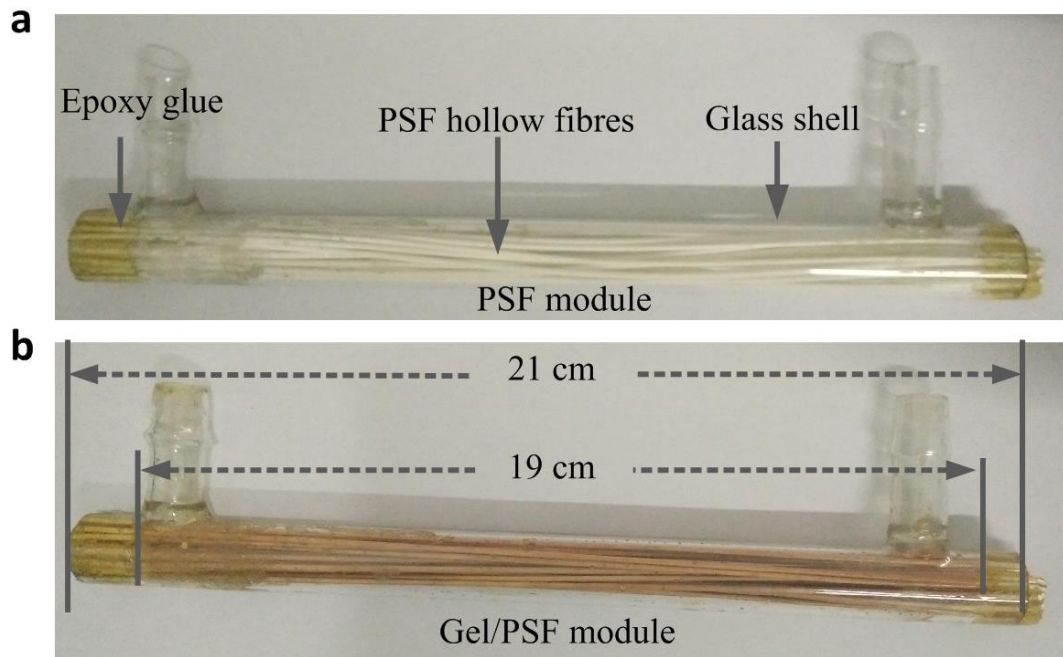

**Supplementary Figure 14 | Optical photographs of membrane module and coated membrane module. a, membrane module and b, coated membrane module.** The change of colour should be explained by the reaction between polymer and ethanolamine.

**Supplementary Table 1 | Comparison of ZIF-8 membranes here with polymeric, zeolite and other MOF membranes reported in previous studies for H<sub>2</sub>/N<sub>2</sub>, H<sub>2</sub>/CH<sub>4</sub> and H<sub>2</sub>/C<sub>3</sub>H<sub>8</sub> systems.**

| Membrane                | Substrate                      | Thickness<br>(100 nm) | Permeance<br>$\times 10^{-8}$ mol m <sup>-2</sup><br>s <sup>-1</sup> Pa <sup>-1</sup> | Selectivity                    |                                 |                                               | Ref  |
|-------------------------|--------------------------------|-----------------------|---------------------------------------------------------------------------------------|--------------------------------|---------------------------------|-----------------------------------------------|------|
|                         |                                |                       |                                                                                       | H <sub>2</sub> /N <sub>2</sub> | H <sub>2</sub> /CH <sub>4</sub> | H <sub>2</sub> /C <sub>3</sub> H <sub>8</sub> |      |
| ZIF-8                   | Al <sub>2</sub> O <sub>3</sub> | 80                    | 20.8                                                                                  | 10.3                           | 10.4                            | 149.6                                         | 1    |
| ZIF-8                   | Al <sub>2</sub> O <sub>3</sub> | 200                   | 18.0                                                                                  | 16.2                           | 31.5                            | 712.6                                         | 2    |
| ZIF-8                   | Al <sub>2</sub> O <sub>3</sub> | 20                    | 43.2                                                                                  | 11.1                           | 12.1                            | -                                             | 3    |
| ZIF-8/LDH               | Al <sub>2</sub> O <sub>3</sub> | 200                   | 14                                                                                    | 10                             | 12.5                            | -                                             | 4    |
| ZIF-8/LDH               | Al <sub>2</sub> O <sub>3</sub> | 11                    | 4.1                                                                                   | 16.8                           | 54.1                            | -                                             | 5    |
| ZIF-8                   | PES                            | 72                    | 40.0                                                                                  | 9.2                            | 8.7                             | -                                             | 6    |
| ZIF-8                   | PSF                            | 200                   | 11.1                                                                                  | 22.7                           | -                               | -                                             | 7    |
| ZIF-8-annealing         | P84                            | 13                    | 3.5                                                                                   | -                              | 103                             | -                                             | 8    |
| ZIF-93-annealing        | P84                            | 26                    | 1.10                                                                                  | -                              | 97.2                            | -                                             | 9    |
| ZIF-8/GO                | AAO                            | 1                     | 5.46                                                                                  | 11.1                           | 11.2                            | 405.0                                         | 10   |
| ZIF-90-<br>modification | Al <sub>2</sub> O <sub>3</sub> | 200                   | 28.5                                                                                  | -                              | 70.5                            | 458.0                                         | 11   |
| ZIF-95                  | Al <sub>2</sub> O <sub>3</sub> | 300                   | 193.0                                                                                 | 10.1                           | 11.0                            | 59.7                                          | 12   |
| NH <sub>2</sub> -MIL-53 | Glass                          | 150                   | 151.7                                                                                 | 23.9                           | 20.7                            | -                                             | 13   |
| CuBTC                   | Al <sub>2</sub> O <sub>3</sub> | 130                   | 3.2                                                                                   | 8.7                            | 6.2                             | -                                             | 14   |
| CuBTC                   | PVDF                           | 30                    | 201.0                                                                                 | 6.5                            | 5.4                             | -                                             | 15   |
| CuBTC/MIL-100           | PVDF                           | 200                   | 8.8                                                                                   | 217                            | 336                             | -                                             | 16   |
| PIM                     | -                              | 1810                  | 1.4                                                                                   | 14.8                           | 11.1                            | -                                             | 17   |
| PIM                     | -                              | 1570                  | 0.5                                                                                   | 9.4                            | 4.9                             | -                                             | 17   |
| Zeolite                 | Al <sub>2</sub> O <sub>3</sub> | 75                    | 16                                                                                    | 8.6                            | 6.5                             | 19.3                                          | 18   |
| ZIF-8                   | PVDF                           | 0.17                  | 2154                                                                                  | 15.1                           | 17.9                            | 1145                                          |      |
| ZIF-8                   | PVDF                           | 0.87                  | 1190                                                                                  | 22.4                           | 27.3                            | 2894                                          | This |
| ZIF-8                   | PVDF                           | 1.14                  | 949                                                                                   | 23.1                           | 28.7                            | 3088                                          |      |
| ZIF-8                   | PSF                            | 2.80                  | 354                                                                                   | 24.1                           | 30.7                            | 3212                                          | work |
| ZIF-8                   | PVDF                           | 7.57                  | 273                                                                                   | 24.8                           | 31.2                            | 3401                                          |      |



**Supplementary Table 2 | Comparison of ZIF-8 membranes here with carbon and other MOF membranes reported in previous studies for C<sub>3</sub>H<sub>6</sub>/C<sub>3</sub>H<sub>8</sub> system.**

| Membrane | Substrate                      | Thickness<br>(100 nm) | Permeance<br>$\times 10^{-8}$ mol m <sup>-2</sup> s <sup>-1</sup> Pa <sup>-1</sup> | Selectivity<br>C <sub>3</sub> H <sub>6</sub> /C <sub>3</sub> H <sub>8</sub> | Ref  |
|----------|--------------------------------|-----------------------|------------------------------------------------------------------------------------|-----------------------------------------------------------------------------|------|
| ZIF-8    | Al <sub>2</sub> O <sub>3</sub> | 22                    | 2.0-3.7                                                                            | 28.0-45.0                                                                   | 19   |
| ZIF-8    | Al <sub>2</sub> O <sub>3</sub> | 15                    | 2.0                                                                                | 55.0                                                                        | 20   |
| ZIF-8    | Al <sub>2</sub> O <sub>3</sub> | 50-200                | 0.7                                                                                | 30.0                                                                        | 21   |
| ZIF-8    | Al <sub>2</sub> O <sub>3</sub> | 800                   | 0.3                                                                                | 59.0                                                                        | 22   |
| ZIF-8    | Al <sub>2</sub> O <sub>3</sub> | 15                    | 2.0                                                                                | 40.0                                                                        | 23   |
| ZIF-8    | Al <sub>2</sub> O <sub>3</sub> | 25                    | 1.1                                                                                | 30.1                                                                        | 24   |
| ZIF-8    | Al <sub>2</sub> O <sub>3</sub> | 200                   | 0.35                                                                               | 14.6                                                                        | 3    |
| ZIF-8    | Al <sub>2</sub> O <sub>3</sub> | 16                    | 0.06                                                                               | 3.5                                                                         | 25   |
| ZIF-8/GO | AAO                            | 1                     | 0.16                                                                               | 12                                                                          | 10   |
| ZIF-8    | BPPO                           | 20                    | 1.5                                                                                | 27.8                                                                        | 26   |
| ZIF-8    | Torlon                         | 90                    | 1.2                                                                                | 12.0                                                                        | 27   |
| ZIF-8    | Torlon                         | 50                    | 2.2                                                                                | 65                                                                          | 28   |
| ZIF-8    | Torlon                         | 81                    | 1.5                                                                                | 180                                                                         | 29   |
| Cabron   | Al <sub>2</sub> O <sub>3</sub> | 3                     | 0.75                                                                               | 16                                                                          | 30   |
| Cabron   | Al <sub>2</sub> O <sub>3</sub> | 3                     | 0.87                                                                               | 17                                                                          | 30   |
| Cabron   | Al <sub>2</sub> O <sub>3</sub> | 3                     | 1.4                                                                                | 23                                                                          | 30   |
| ZIF-8    | PVDF                           | 0.17                  | 83.7                                                                               | 44.5                                                                        |      |
| ZIF-8    | PVDF                           | 0.87                  | 27.6                                                                               | 67.2                                                                        | This |
| ZIF-8    | PVDF                           | 1.14                  | 20.8                                                                               | 67.8                                                                        |      |
| ZIF-8    | PSF                            | 2.80                  | 7.6                                                                                | 69.5                                                                        | work |
| ZIF-8    | PVDF                           | 7.57                  | 5.7                                                                                | 70.8                                                                        |      |

## Supplementary References

1. Zhang, X. F. *et al.* A simple and scalable method for preparing low-defect ZIF-8 tubular membranes. *J. Mater. Chem. A* **1**, 10635-10638 (2013).
2. Liu, Q., Wang, N., Caro, J. & Huang, A. Bio-inspired polydopamine: A versatile and powerful platform for covalent synthesis of molecular sieve membranes. *J. Am. Chem. Soc.* **135**, 17679-17682 (2013).
3. Huang, K., Dong, Z. Y., Li, Q. Q. & Jin, W. Q. Growth of a ZIF-8 membrane on the inner-surface of a ceramic hollow fiber via cycling precursors. *Chem. Commun.* **49**, 10326-10328 (2013).
4. Liu, Y., Wang, N. Y., Pan, J. H., Steinbach, F. & Caro, J. In-situ synthesis of MOF membranes on ZnAl-CO<sub>3</sub> LDH buffer layer-modified substrates. *J. Am. Chem. Soc.* **136**, 14353-14356 (2014).
5. Liu, Y. *et al.* Remarkably enhanced gas separation by partial self-conversion of a laminated membrane to metal-organic frameworks. *Angew. Chem. Int. Ed.* **54**, 3028-3032 (2015).
6. Ge, L., Zhou, W., Du, A. J. & Zhu, Z. H. Porous polyethersulfone-supported zeolitic imidazolate framework membranes for hydrogen separation. *J. Phys. Chem. C* **116**, 13264-13270 (2012).
7. Su, P. *et al.* Metal based gels as versatile precursors to synthesize stiff and integrated MOF/polymer composite membranes. *J. Mater. Chem. A* **3**, 20345-20351 (2015).
8. Cacho-Bailo, F. *et al.* MOF-polymer enhanced compatibility: post-annealed zeolite imidazolate framework membranes inside polyimide hollow fibers. *RSC Adv.* **6**, 5881-5889 (2016).

9. Cacho-Bailo, F. *et al.* High selectivity ZIF-93 hollow fiber membranes for gas separation. *Chem. Commun.* **51**, 11283-11285 (2015).
10. Hu, Y. X. *et al.* Zeolitic imidazolate framework/graphene oxide hybrid nanosheets as seeds for the growth of ultrathin molecular sieving membranes. *Angew. Chem. Int. Ed.* **55**, 204-2052 (2016).
11. Huang, A., Wang, N., Kong, C. & Caro, J. Organosilica-functionalized zeolitic imidazolate framework ZIF-90 membrane with high gas-separation performance. *Angew. Chem. Int. Ed.* **51**, 10551-10555 (2012).
12. Huang, A. *et al.* A highly permeable and selective zeolitic imidazolate framework ZIF-95 membrane for H<sub>2</sub>/CO<sub>2</sub> separation. *Chem. Commun.* **48**, 10981-10983 (2012).
13. Zhang, F. *et al.* Hydrogen selective NH<sub>2</sub>-MIL-53(Al) MOF membranes with high permeability. *Adv. Funct. Mater.* **22**, 3583-3590 (2012).
14. Zhou, S. Y. *et al.* Challenging fabrication of hollow ceramic fiber supported Cu<sub>3</sub>(BTC)<sub>2</sub> membrane for hydrogen separation. *J. Mater. Chem.* **22**, 10322-10328 (2012).
15. Mao, Y. Y. *et al.* Pressure-assisted synthesis of HKUST-1 thin film on polymer hollow fiber at room temperature toward gas separation. *ACS Appl. Mater. Interfaces* **6**, 4473-4479 (2014).
16. Li, W. *et al.* Transformation of metal-organic frameworks for molecular sieving membranes. *Nature Commun.* **7**, 11315 (2016).
17. Carta, M. *et al.* An efficient polymer molecular sieve for membrane gas separations. *Science* **339**, 303-307 (2013).
18. Huang, A., Wang, N. & Caro, J. Synthesis of multi-layer zeolite LTA membranes with enhanced gas separation performance by using 3-aminopropyltriethoxysilane as interlayer.

- Microporous Mesoporous Mater.* **164**, 294-301 (2012).
19. Pan, Y., Li, T., Lestari, G. & Lai, Z. Effective separation of propylene/propane binary mixtures by ZIF-8 membranes. *J. Membr. Sci.* **390**, 93-98 (2012).
  20. Kwon, H. T. & Jeong, H. K. In situ synthesis of thin zeolitic-imidazolate framework ZIF- 8 membranes exhibiting exceptionally high propylene/propane separation. *J. Am. Chem. Soc.* **135**, 10763-10768 (2013).
  21. Shah, M. N., Gonzalez, M. A., McCarthy, M. C. & Jeong, H. K. An unconventional rapid synthesis of high performance metal-organic framework membranes. *Langmuir* **29**, 7896-7902 (2013).
  22. Hara, N. *et al.* Diffusive separation of propylene/propane with ZIF-8 membranes. *J. Membr. Sci.* **450**, 215-223 (2014).
  23. Kwon, H. T. & Jeong, H. K. Highly propylene-selective supported zeolite-imidazolate framework (ZIF-8) membranes synthesized by rapid microwave-assisted seeding and secondary growth. *Chem. Commun.* **49**, 3854-3856 (2013).
  24. Liu, D., Ma, X., Xi, H. & Lin, Y. S. Gas transport properties and propylene/propane separation characteristics of ZIF-8 membranes. *J. Membr. Sci.* **451**, 85-93 (2014).
  25. Shekhah, O. *et al.* The liquid phase epitaxy approach for the successful construction of ultra-thin and defect-free ZIF-8 membranes: pure and mixed gas transport study. *Chem. Commun.* **50**, 2089-2092 (2014).
  26. Shamsaei, E. *et al.* Aqueous phase synthesis of ZIF- 8 membrane with controllable location on an asymmetrically porous polymer substrate. *ACS Appl. Mater. Interfaces* **8**, 6236-6244 (2016).

27. Brown, A. J. *et al.* Interfacial microfluidic processing of metal-organic framework hollow fiber membranes. *Science* **345**, 72-75 (2014).
28. Eum, K. *et al.* Fluidic processing of high-performance ZIF-8 membranes on polymeric hollow fibers: Mechanistic insights and microstructure control. *Adv. Funct. Mater.* **26**, 5011-5018 (2016).
29. Eum, K., Ma, C., Rownaghi, A., Jones, C. W. & Nair, S. ZIF- 8 membranes via interfacial microfluidic processing in polymeric hollow fibers: efficient propylene separation at elevated pressures. *ACS Appl. Mater. Interfaces* **8**, 25337-25342 (2016).
30. Ma, X., Lin, Y. S., Wei, X. & Kniep, J. Ultrathin carbon molecular sieve membrane for propylene/propane separation. *AIChE J.* **62**, 491-499 (2016).
